# Supplementary material for: Infection-induced behavioural changes reduce connectivity and the potential for disease spread in wild mice contact networks
Source: PubMed Central journal article supplement (PMC4993150; doi:10.1038/srep31790), 2016-08-22

## **Supplementary information to:**

### **Infection-induced behavioural changes reduce connectivity and the potential for disease spread in wild mice contact networks**

Patricia C. Lopes<sup>1\*</sup>, Per Block<sup>2</sup>, Barbara König<sup>1</sup>

<sup>1</sup>Department of Evolutionary Biology and Environmental Studies, University of Zurich, Zurich, Switzerland.

<sup>2</sup>Department of Humanities, Social and Political Sciences, ETH, Zurich, Switzerland.

\*Correspondence to: [patricia.lopes@ieu.uzh.ch](mailto:patricia.lopes@ieu.uzh.ch).

## Supplementary Information

**Table S1.** Final number of injected animals per social group.

| group | sex  | injection | # of animals |
|-------|------|-----------|--------------|
| c2a   | Fem  | Control   | 1            |
|       | Fem  | LPS       | 2            |
|       | Male | Control   | 3            |
|       | Male | LPS       | 2            |
| a1    | Fem  | Control   | 2            |
|       | Fem  | LPS       | 1            |
|       | Male | Control   | 2            |
|       | Male | LPS       | 1            |
| a6    | Fem  | Control   | 2            |
|       | Fem  | LPS       | 2            |
|       | Male | Control   | 1            |
|       | Male | LPS       | 1            |
| a7    | Fem  | Control   | 2            |
|       | Fem  | LPS       | 1            |
|       | Male | Control   | 2            |
|       | Male | LPS       | 2            |
| a9    | Fem  | Control   | 2            |
|       | Fem  | LPS       | 2            |
|       | Male | Control   | 1            |
|       | Male | LPS       | 2            |
| b4    | Fem  | Control   | 2            |
|       | Fem  | LPS       | 1            |
|       | Male | Control   | 1            |
|       | Male | LPS       | 3            |
| b5    | Fem  | Control   | 2            |
|       | Fem  | LPS       | 1            |
|       | Male | Control   | 2            |
|       | Male | LPS       | 2            |
| b8    | Fem  | Control   | 1            |
|       | Fem  | LPS       | 2            |
|       | Male | Control   | 1            |
|       | Male | LPS       | 2            |
| c10   | Fem  | Control   | 1            |
|       | Fem  | LPS       | 1            |
|       | Male | Control   | 1            |
|       | Male | LPS       | 2            |
| c2b   | Fem  | Control   | 2            |
|       | Fem  | LPS       | 2            |
|       | Male | Control   | 2            |
|       | Male | LPS       | 1            |
| c3    | Fem  | Control   | 2            |
|       | Fem  | LPS       | 2            |
|       | Male | LPS       | 2            |

**Figure S1.** Change in number of social partners per focal mouse. Change in degree (a), out-degree (b) and in-degree (c) of individual mice injected with either LPS or control on the night of injection or two nights before, assessed by overlap in nest box use overnight. Each line represents one mouse. Relative to the null distribution, solid lines show a significant decrease in measure, dotted lines no significant change, and dashed lines a significant increase.

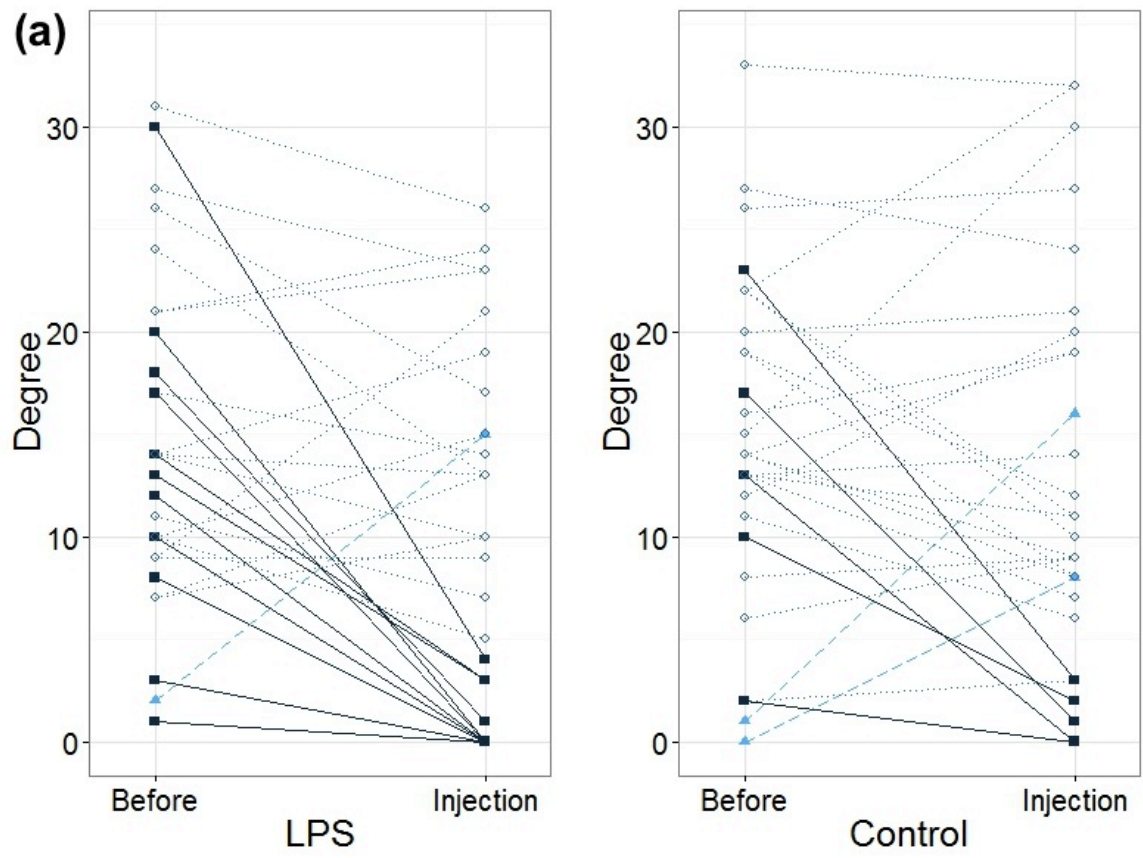

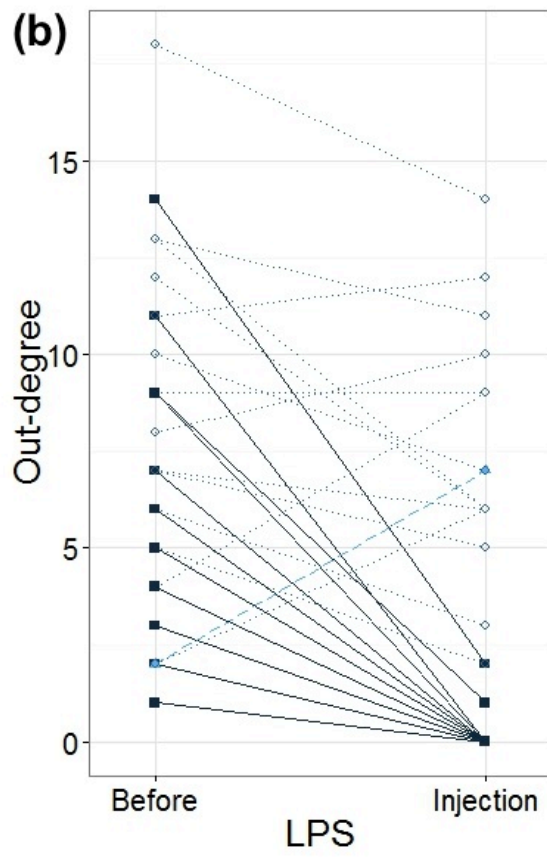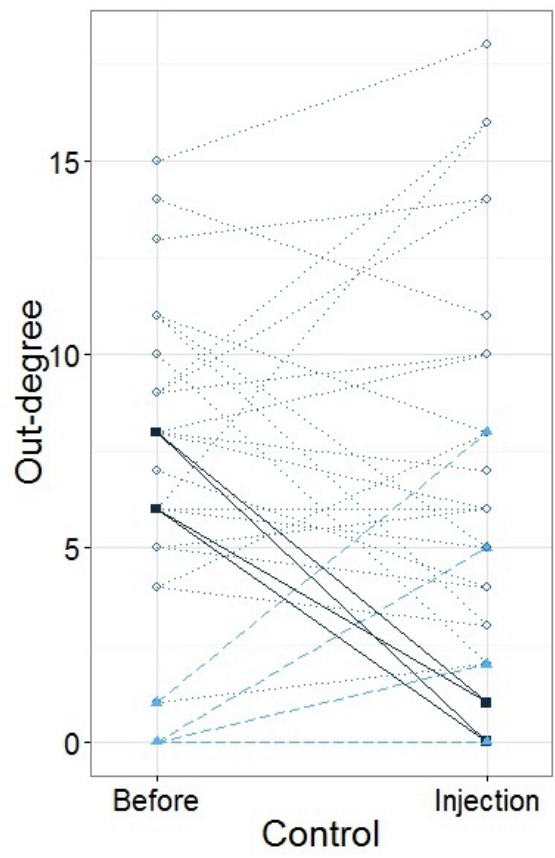

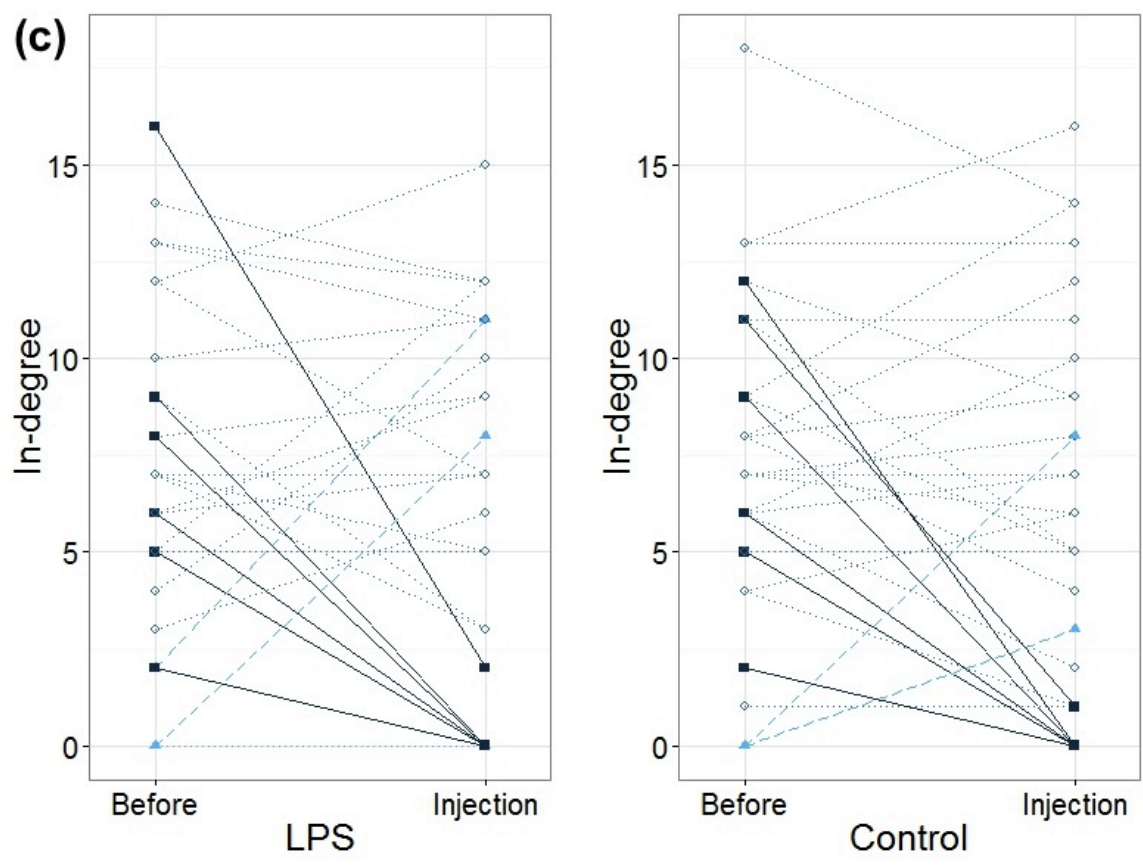

Supplement: srep31790-s1.pdf [file srep31790-s1.pdf]
